# Supplementary material for: Protocol of a prospective comprehensive evaluation of an elastic band beard cover for filtering facepiece respirators in healthcare
Source: PLOS journal article supplement (doi:10.1371/journal.pone.0281152), 2023-01-31
Supplement: S5 (10.1371/journal.pone.0281152.s005) [file journal.pone.0281152.s005]

# QA2022022 QA Acknowledgement

Forza (Bragato), Angela

Wed 3/16/2022 3:06 PM

To: Williams, Daryl <Daryl.Williams@mh.org.au>; Ng, Irene <Irene.Ng@mh.org.au>;

Cc: Begg, Fiona <fiona.begg@mh.org.au>; Bodas, Charles <Charles.Bodas@mh.org.au>; Kave, Benjamin <Ben.Kave@mh.org.au>;

 8 attachments

QA Application Form\_Elastic Band Singth Thattha\_04022022.docx; QA protocol\_Theraband\_Feb2022.docx; Appendix 3\_Theraband respirator usability assessment\_08.02.22.docx; Appendix 4\_Theraband Research - HCW unable to shave - information sheet\_8.2.2022.docx; Appendix 5\_Theraband technique and QNFT procedure\_Feb2022.docx; Appendix 1\_Screening survey questions\_FFRs Theraband\_08.02.22.docx; Appendix 2\_Skill assessment\_Theraband & Respirator 08.02.22.docx; QA HOD Approval and Declaration Form\_Feb2022.docx;

Dear Prof Williams,

## **QA2022022 titled: Respiratory Protection Program evaluation of the under-respirator elastic band beard cover (Singh Thattha technique) at Royal Melbourne Hospital**

The project has been reviewed against the tenets of the National Statement on Ethical Conduct in Research 2007 (updated 2018) and the NHMRC Ethical Considerations in Quality Assurance and Evaluation Activities (March 2014).

This project has been assessed by a member of the Office for Research Ethics & Governance team and a member of the Royal Melbourne Hospital (RMH) HREC, as evaluation activity not requiring Human Research Ethics Committee (HREC) review.

Site - Royal Melbourne Health VIC

### Documents noted:

- QA Application Form signed by Project Lead 04/02/2022
- Protocol Version 1 dated 01/02/2022
  - Appendix 1 - Screening survey questions\_FFRs Theraband\_08.02.22
  - Appendix 2 - Skill assessment\_Theraband & Respirator 08.02.22
  - Appendix 3 - Theraband respirator usability assessment\_08.02.22
  - Appendix 4 - Theraband Research - HCW unable to shave - information sheet\_8.2.2022
  - Appendix 5 - Theraband technique and QNFT procedure\_Feb2022
- QA Head of Department Approval and Declaration Form signed 04.02.2022

### Other information about your QA approval:

Your project number is **QA2022022**. Please quote this number in future correspondence

- If there are any changes to the project a new QA project will need to be submitted
- If the study is to continue beyond 2 years, a new QA project will need to be submitted
- Annual progress reports are not required for QA projects.

- All documentation regarding this project, including this email, must be kept for 12 months from completion.
- However if you intend to publish the results, documentation must be kept for 5 years post publication or 5 years from the decision not to publish.

Note for multisite projects:

- This assessment is for RMH sites only. For other sites, the organisation may accept this assessment or choose to undertake another assessment.
- Site Governance Authorisation is required at each site participating in the study before the research project can commence at that site.

**PLEASE FILE THIS EMAIL WITH THE PROJECT RECORDS.**

Regards,

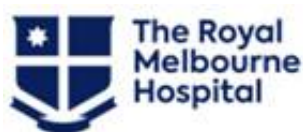

**Angela Forza - Manager Human Research Ethics Committee**

Office for Research, RMH City Campus, Level 2 South West

300 Grattan Street | Parkville Victoria 3050

[angela.forza@mh.org.au](mailto:angela.forza@mh.org.au) | [thermh.org.au](http://thermh.org.au) | (P) 9342 8530

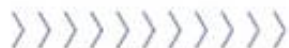

*The Royal Melbourne Hospital acknowledges the Kulin nations as the Traditional Custodians of the land on which our services are located.*

*We are committed to improving the health and wellbeing of Aboriginal and Torres Strait Islander peoples.*

WORKING DAYS: Part Time - Tues & Wed

**New Process: Streamlined Annual Reporting**

**Single due date for all projects**

Effective immediately annual reports for **ALL** projects (Reviewing HREC and Site Specific) are now due **31 March each year**.

For full details including what this change means for you project refer to the [OFR website](#).
